# Supplementary material
Source: publisher figshare collection journal article supplement (https://wiley.figshare.com/articles/dataset/_/3567018)
Supplement: Supplementary file 1 [file 1 › appendix-B.htm]

Ecological Archives M080-004-A2


### *Ecological Archives* M080-004-A2

### **Louie H. Yang, Kyle Edwards, Jarrett E. Byrnes, Justin L. Bastow, Amber N. Wright, and Kenneth O. Spence. 2010. A meta-analysis of resource pulse–consumer interactions. *Ecological Monographs* 80:125-151.**

Appendix B. Multilevel regression example.

> View / download PDF.

---


[Back to M080-004]
